# Supplementary material for: A green luminescent 1-D helical tubular dipyrazol-bridged cadmium(ii) complex: a coordination tube included in a supramolecular tube
Source: Royal Society of Chemistry journal article supplement (doi:10.1039/c3dt50620g), 2013-01-01
Supplement: c3dt50620g.pdf [file c3dt50620g.pdf]

## A green luminescent 1-D helical tubular dipyrazol-bridged cadmium(II) complex: a coordination tube included in a supramolecular tube

Yan-Qiong Sun,<sup>\*a,b</sup> Song Deng,<sup>a</sup> Qi-Liu,<sup>a</sup> Su-Zhi Ge<sup>a</sup> and Yi-Ping Chen<sup>a</sup>

<sup>a</sup>Department of Chemistry, Fuzhou University, Fuzhou, Fujian 350108, People's Republic of China. Fax: +86-591-22866340; E-mail [sunyq@fzu.edu.cn](mailto:sunyq@fzu.edu.cn)

<sup>b</sup>State Key Laboratory of Structural Chemistry, Fujian Institute of Research on the Structure of Matter, Chinese Academy of Sciences, Fuzhou, Fujian 350002, PR China

### Electronic Supplementary Information:

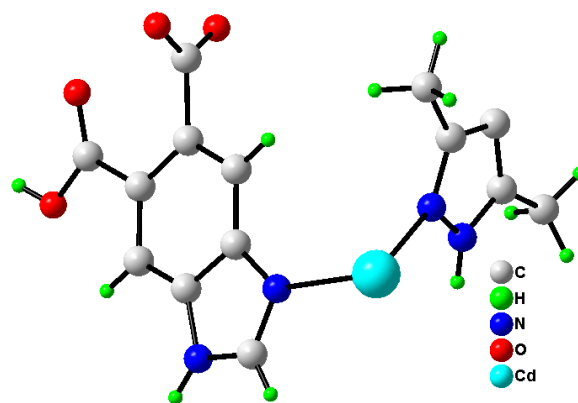

Fig. S1 Ball-stick view of the asymmetrical unit of **1**.

In the asymmetrical unit of **1**, there is 0.5 Cd<sup>2+</sup> ion, 0.5 H<sub>2</sub>Me<sub>4</sub>bpz ligand and one H<sub>2</sub>bicd<sup>-</sup> anion, respectively.

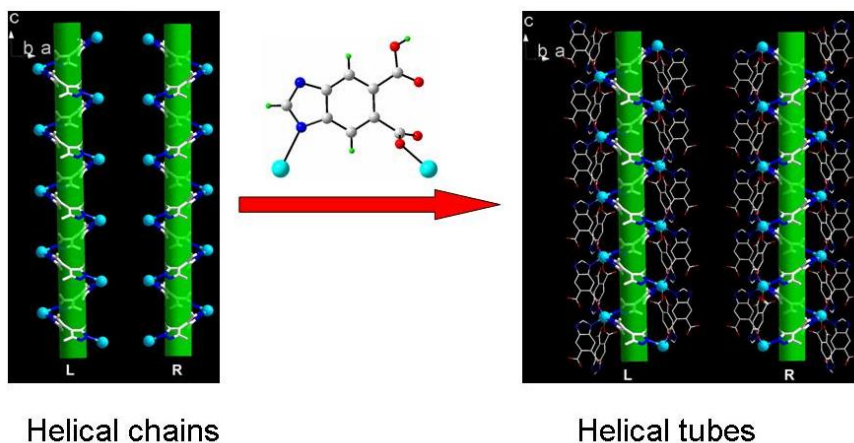

Fig. S2 View of the construction of the coordination helical tubes of **1** running along *c* axis.

The combination of bitopic  $\text{H}_2\text{Me}_4\text{bpz}$  with metal ions leads to two types of coordination helical chains with opposite chirality as shown in Fig 2, S2, possessing a  $2_1$  screw axis parallel to  $c$  with a pitch of  $8.392(2)$  Å. The left- and right-handed helical chains are further weaved by  $\text{H}_2\text{bidc}^-$  anions through chelating the adjacent two  $\text{Cd}^{2+}$  ions parallel to  $c$  axis to make the elliptical helical tubes with opposite chirality.

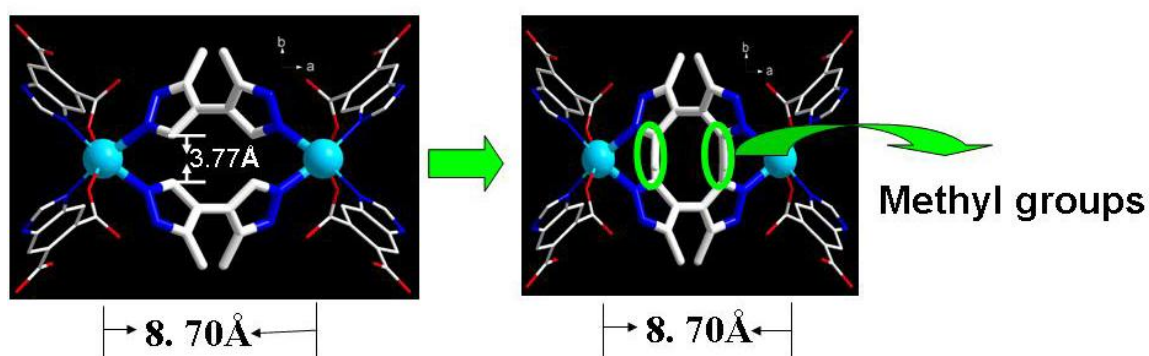

Fig. S3 The helical tube of **1** viewed along  $c$  axis.

The dimension of the coordination helical tube is about  $3.77$  Å  $\times$   $8.70$  Å. The one of the two methyl groups of  $\text{H}_2\text{Me}_4\text{bpz}$  point away from the  $\text{Cd}-\text{H}_2\text{Me}_4\text{bpz}$  helical chains and into the coordination helical tubes, then, the elliptical coordination tubes became the smaller approximate circular tubes.

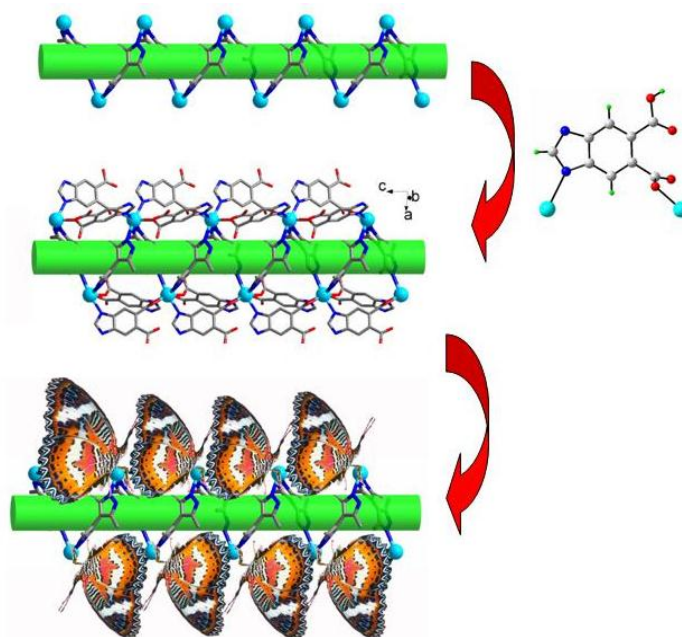

Fig. S4 The  $[\text{Cd}_2(\text{H}_2\text{bidc})_2]$  units like butterflies settling on the two sides of the tube.

The  $[\text{Cd}_2(\text{H}_2\text{bidc})_2]$  units like butterflies settled on the two sides of these tubes (Fig 1, S6).

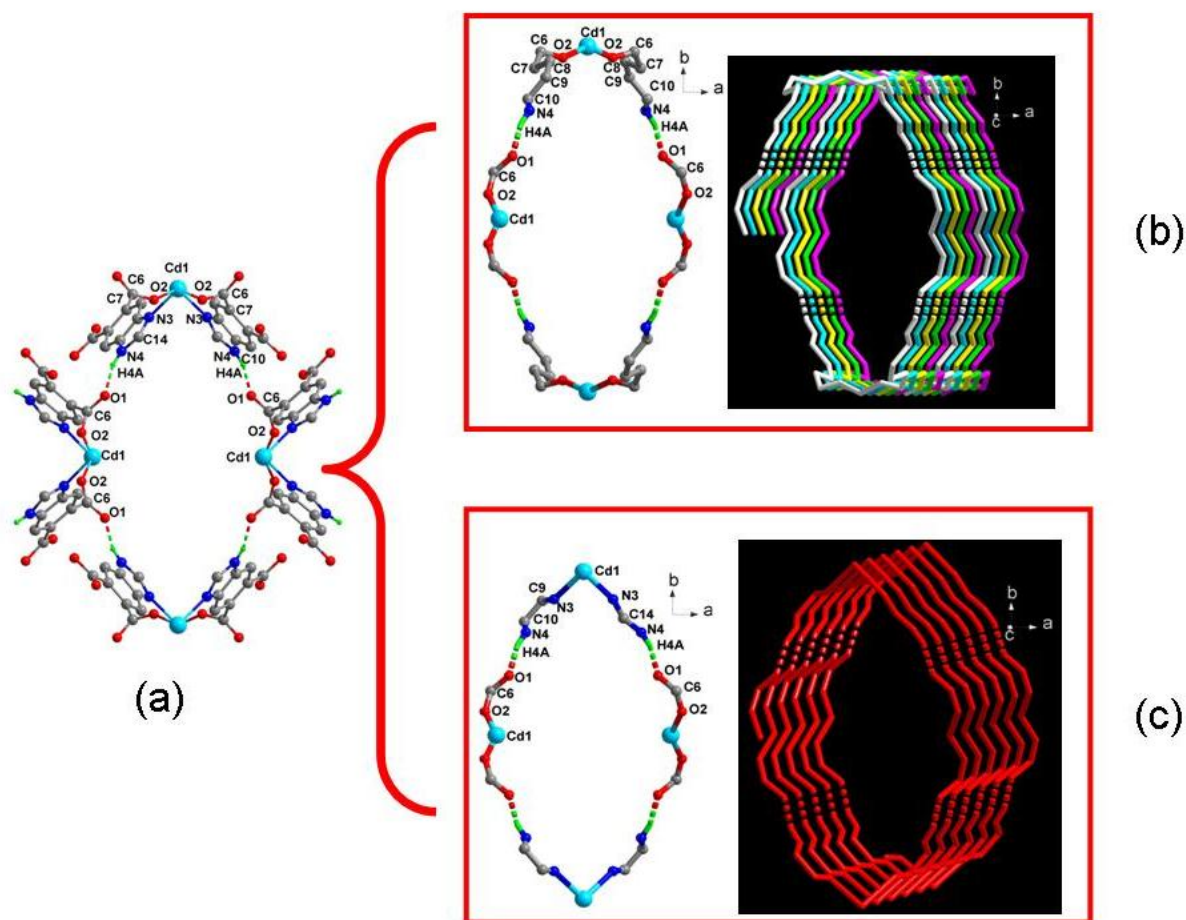

**Fig. S5** The construction of the supramolecular helical tube in the combination of quintuple-helical-chain with single-helical-chain in the structure of **1**, (a) view of the supramolecular helical tube; (b) View of the supramolecular helical channels made of quintuple-helical-chain containing unclosed 48-membered ring along the [001] direction. Five helical chains of the quintuple-helical-chain are equivalent. [In the structure, four  $[\text{Cd}(\text{H}_2\text{bidc})]_n$  units are linked by N–H $\cdots$ O hydrogen bonds through two repeated  $-\text{Cd1}-\text{O2}-\text{C6}-\text{O1}\cdots\text{H4A}-\text{N4}-\text{C10}-\text{C9}-\text{C8}-\text{C7}-\text{C6}-\text{O2}-\text{Cd1}-\text{O2}-\text{C6}-\text{C7}-\text{C8}-\text{C9}-\text{C10}-\text{N4}-\text{H4A}\cdots\text{O1}-\text{C6}-\text{O2}-$  linkages to give rise to helical channels containing quintuple-helical-chain with the pitch of 8.392(2) Å along the *c*-axis; (c) View of the supramolecular helical channels made of single-helical-chain containing unclosed 34-membered ring along the [001] direction. [In the structure, the Cd atoms are linked by carboxyl groups of O1C6O2 and N–H $\cdots$ O hydrogen bonds through two repeated  $-\text{Cd1}-\text{O2}-\text{C6}-\text{O1}\cdots\text{H4A}-\text{N4}-\text{C10}-\text{C9}-\text{N3}-\text{Cd1}-\text{N3}-\text{C14}-\text{N4}-\text{H4A}\cdots\text{O1}-\text{C6}-\text{O2}-$  linkages to give rise to helical channels along the *c*-axis.

In compound **1**,  $\text{H}_2\text{Me}_4\text{bpz}$  and  $\text{H}_2\text{bidc}$  ligands both can act not only as a hydrogen-bond acceptor but also as a hydrogen bond-donor, so there are complex strong hydrogen bonds between them. Four  $[\text{Cd}(\text{H}_2\text{bidc})]_n$  units are linked by N–H $\cdots$ O hydrogen bonds (N $\cdots$ O: 2.659 Å and 2.895 Å)

to form a nano-size elliptical supramolecular helical channels with the dimension of  $17.04 \text{ \AA} \times 8.70 \text{ \AA}$ . The supramolecular helical channels, which are made of quintuple-helical chains, are further weaved by single-helical chains to make the tubular walls. As shown in Figure S7, the walls of the supramolecular helical tubular channels can be described as two parts: one part is the helical channels made of the quintuple-helical-chain containing five equivalent helical chains (Figure S7b), another is single-helical-chain (Figures S7c). The quintuple-helical-chain are further weaved by the single-helical-chain with the same helical orientation each other through sharing Cd vertices to form a unique helical tubular combination.

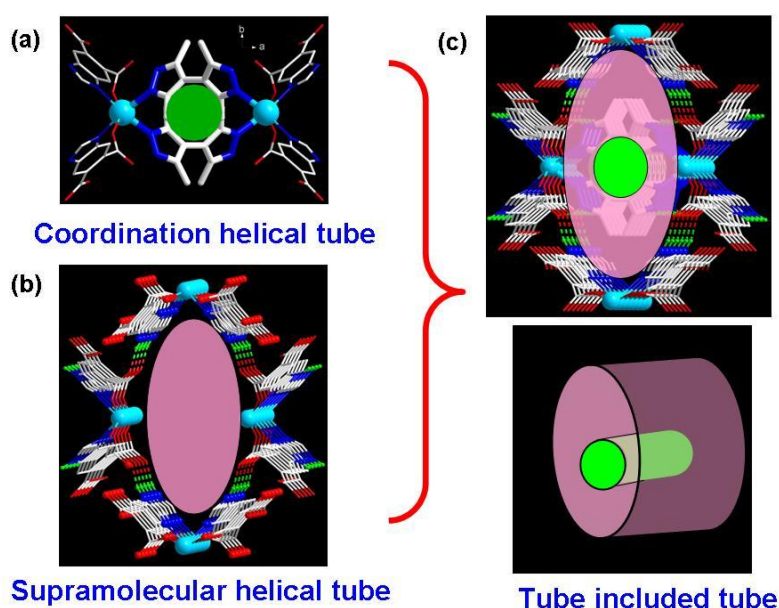

**Fig. S6** The construction of the tube-in-tube structure viewed along *c* axis: (a) The coordination helical tube through Cd-N, Cd-O coordination bonds; (b) The supramolecular helical tube built from four  $[\text{Cd}(\text{H}_2\text{bidc})]_n$  units linked by N-H...O hydrogen bonds; (c) View of the coordination helical tube in the supramolecular helical tube.

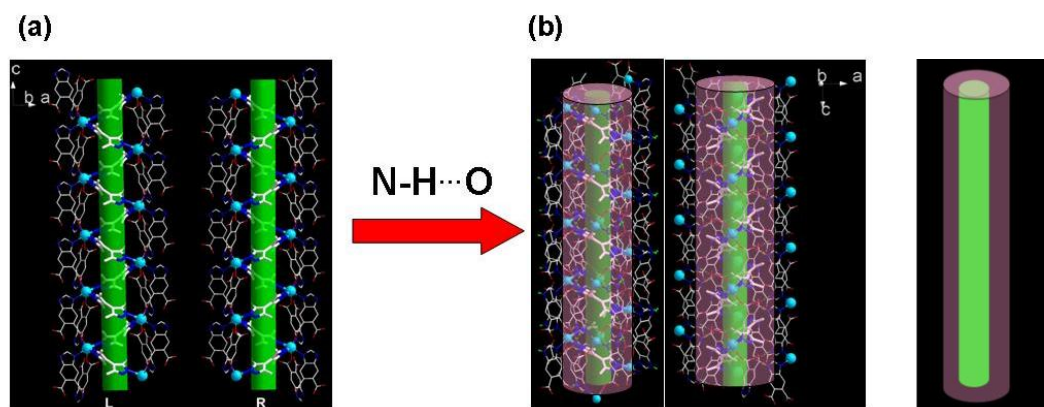

**Fig. S7** The construction of the tube-in-tube structure viewed along *b* axis: (a) The coordination helical tube running along *c* axis; (b) The tube-in-tube structure.

Four  $[\text{Cd}(\text{H}_2\text{bidc})]_n$  units are linked by  $\text{N}-\text{H}\cdots\text{O}$  hydrogen bonds ( $\text{N}\cdots\text{O}$ : 2.659 Å and 2.895 Å) to form a nano-size elliptical supramolecular helical channels with the dimension of 17.04 Å × 8.70 Å, and the coordination helical tube with the same-handedness is contained in it.

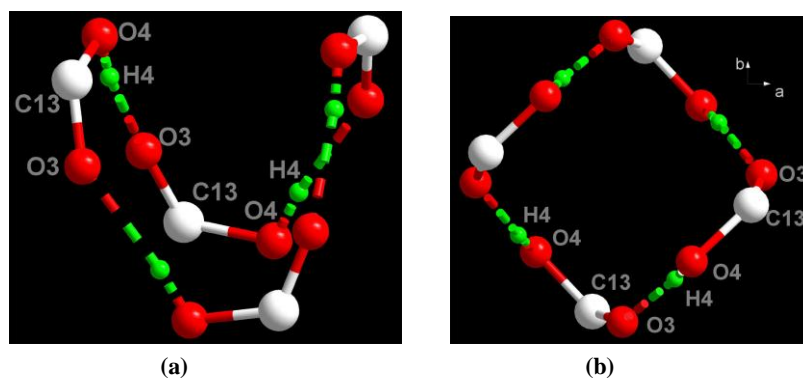

**Fig. S8** View of a 16-membered hydrogen bond ring in boat-like conformation comprised of four carboxylate groups by  $\text{O}-\text{H}\cdots\text{O}$  hydrogen bonds.

The uncoordinated carboxylate groups point to the channels. Four carboxylate groups comprised a 16-membered ring in boat-like conformation by  $\text{O}-\text{H}\cdots\text{O}$  hydrogen bonds ( $\text{O}\cdots\text{O}$ : 2.595 Å).

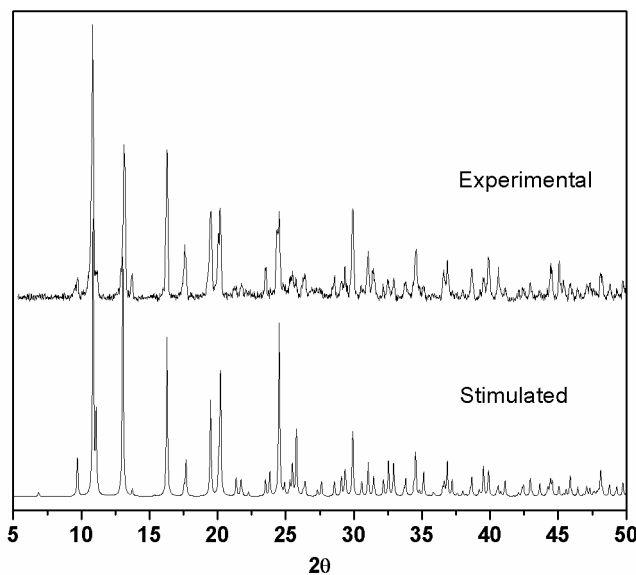

**Fig. S9** The PXRD pattern of **1** and simulated respectively.

The good accordance of the experimental PXRD patterns with the simulated patterns indicates phase purity of **1**.

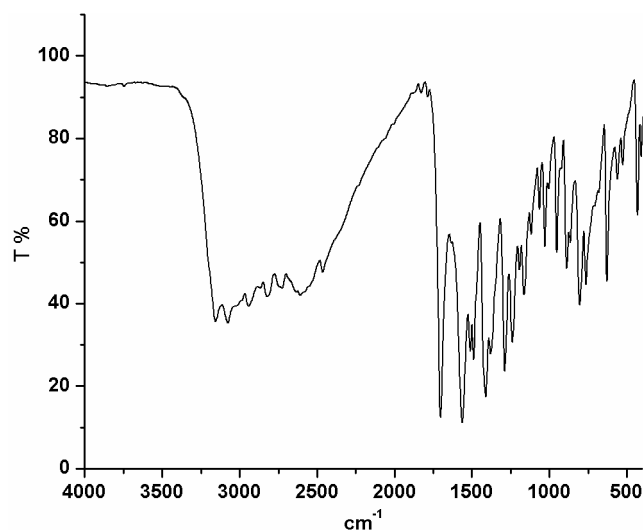

**Fig. S10** IR spectrum of **1**

The IR spectrum (Fig S9) of **1** exhibits the strong and sharp absorption peaks, of 1562 and 1488  $\text{cm}^{-1}$  attributed to the  $\nu_{\text{as}}$  and  $\nu_{\text{s}}$  vibration of the carboxylate group, respectively, and peaks at 1702  $\text{cm}^{-1}$  corresponding to the  $\nu(\text{C}=\text{O})$  of carboxylic acid, indicating that the carboxyl groups of  $\text{H}_2\text{bidc}$  ligands are not completely deprotonated. The broad bands at 3155-2500  $\text{cm}^{-1}$  indicate the presence of O-H and N-H, and the existence of hydrogen bonding interaction. These facts are consistent with the X-ray diffraction results.

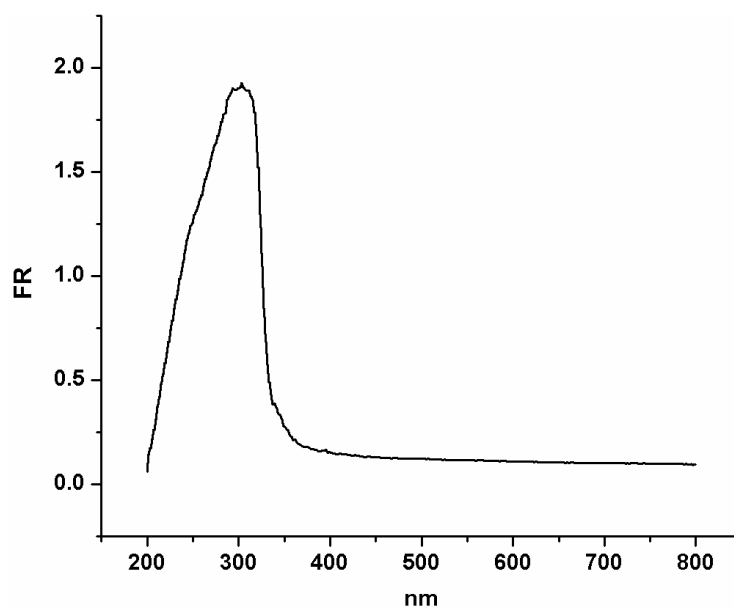

**Fig. S11** UV-Visible absorption spectrum of **1**.

In the UV absorption spectra, the strong absorptions at 304 nm for compound **1**. (Fig. S11), is ascribed to the  $\pi \rightarrow \pi^*$  transitions of ligands.

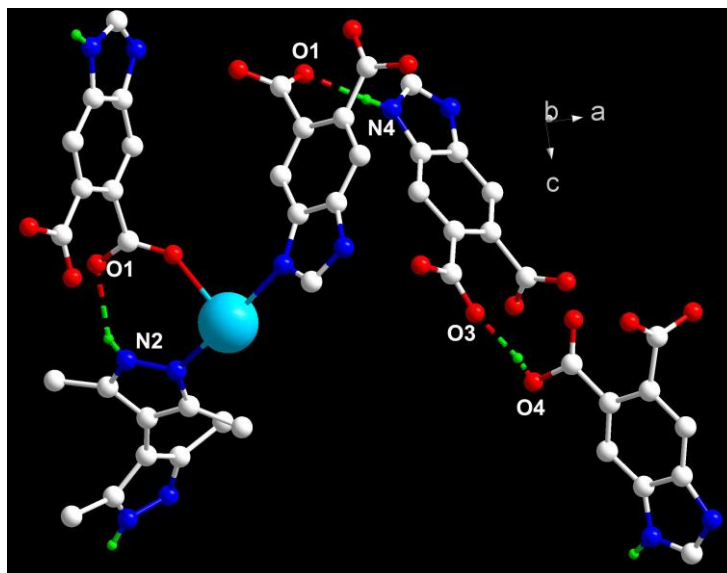

Fig. S12 View of three types of hydrogen bonds.

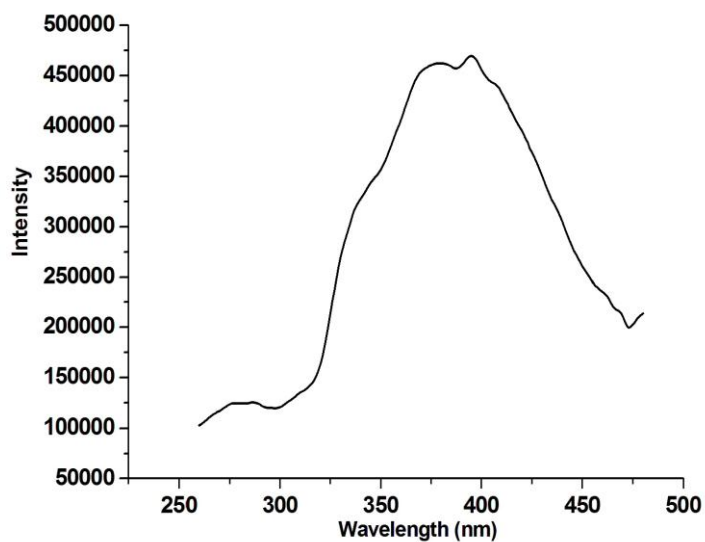

Fig. S13 Excitation spectrum of **1**

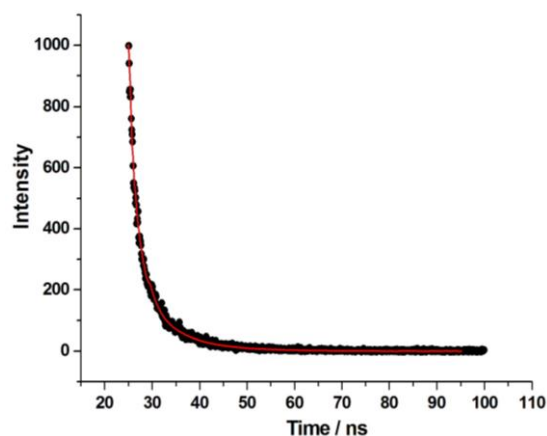

**Fig. S14** The lifetime of fluorescence-emission for **1**

#### Fit Parameters

$$\text{Fit} = A + B1.\exp(-t/T1) + B2.\exp(-t/T2) + B3.\exp(-t/T3)$$

|       | Value     | Std Dev   |    | Value    | Std Dev  | Rel % |
|-------|-----------|-----------|----|----------|----------|-------|
| T1    | 1.044E-10 | 2.694E-11 | B1 | 4.289E-1 | 9.837E-2 | 10.48 |
| T2    | 7.826E-9  | 1.753E-10 | B2 | 2.667E-2 | 1.338E-3 | 48.85 |
| T3    | 1.959E-9  | 8.201E-11 | B3 | 8.870E-2 | 2.670E-3 | 40.67 |
| Chisq | 1.379E+0  |           | A  | 3.760E-1 |          |       |

The luminescence decay curves of **1** at room temperature are well fit into a triexponential function as  $I = A + B1 \times \exp(-t/\tau_1) + B2 \times \exp(-t/\tau_2) + B3 \times \exp(-t/\tau_3)$ . The emission decay lifetimes are  $\tau_1 = 0.10$  ns (10.48%),  $\tau_2 = 7.82$  ns (48.85%) and  $\tau_3 = 1.96$  ns (40.67%) ( $\chi^2 = 1.379$ ) for **1**.
